# Supplementary material for: Simultaneously targeting inflammatory response and parasite sequestration in brain to treat Experimental Cerebral Malaria
Source: PubMed Central journal article supplement (PMC4521148; doi:10.1038/srep12671), 2015-07-31
Supplement: srep12671-s1.pdf [file srep12671-s1.pdf]

**Supplementary information for:**

Manuscript title: **Simultaneously targeting inflammatory response and parasite sequestration in brain to treat Experimental Cerebral Malaria**

Chaitanya Dende<sup>1</sup>, Jairam Meena<sup>2</sup>, Perumal Nagarajan<sup>2</sup>, Amulya K Panda<sup>2</sup>, Pundi N Rangarajan<sup>1</sup>, Govindarajan Padmanaban<sup>1</sup>.

<sup>1</sup>Department of Biochemistry, Indian Institute of Science, Bengaluru-560012 and <sup>2</sup>National Institute of Immunology, New Delhi.

Correspondence to be addressed to: P.N.R. ([pnr@biochem.iisc.ernet.in](mailto:pnr@biochem.iisc.ernet.in)) or G.P. ([geepee@biochem.iisc.ernet.in](mailto:geepee@biochem.iisc.ernet.in)).

**Supplementary Figure 1.** Representative whole body bioluminescent images of untreated and curcumin-treated mice infected with *P. berghei*-ANKA transgenic parasites expressing luciferase.

**Supplementary Figure 2.** FACS analysis of CXCR3<sup>+</sup>/CD3<sup>+</sup>/CD8<sup>+</sup> cells in brain leucocytes of uninfected and *P. berghei*-infected mice.

**Supplementary Table 1.** Primers used in qPCR reactions

**Supplementary Table 2.** Analysis of curcumin in plasma and brain of mice.

**Supplementary Figure 3.** Unprocessed original scans of blots in Figure 5b

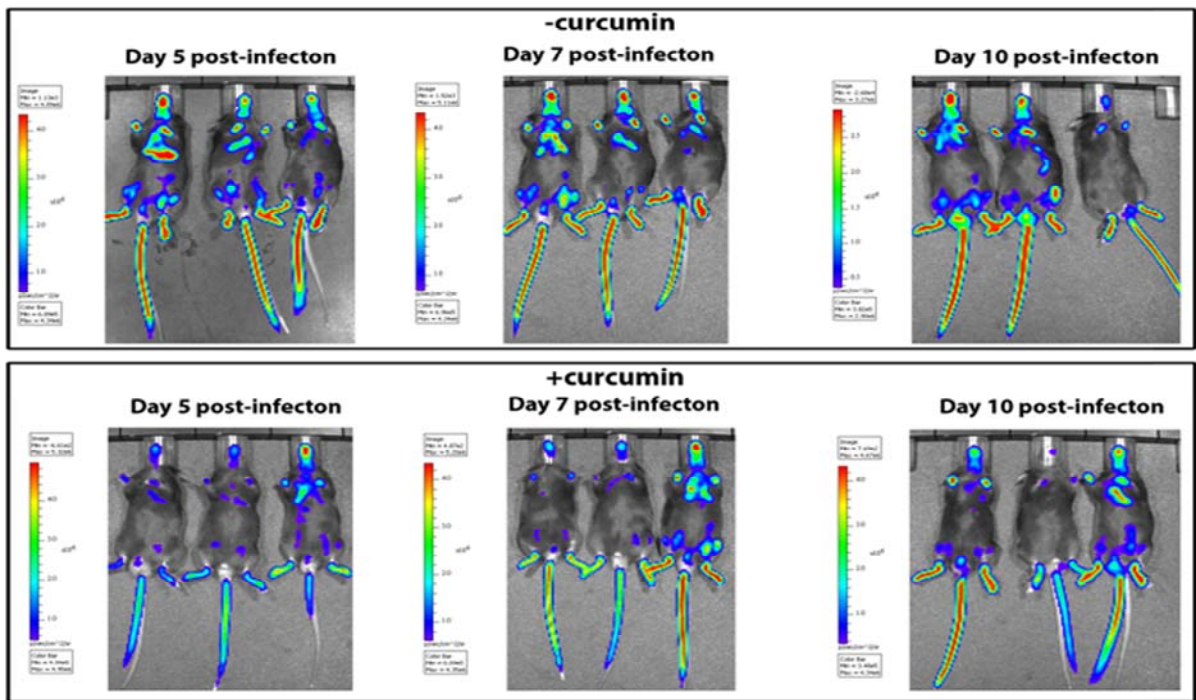

**Supplementary Figure 1.** Representative whole body bioluminescent images of untreated (-curcumin) and curcumin-treated mice infected with *P. berghei*-ANKA transgenic parasites expressing luciferase.

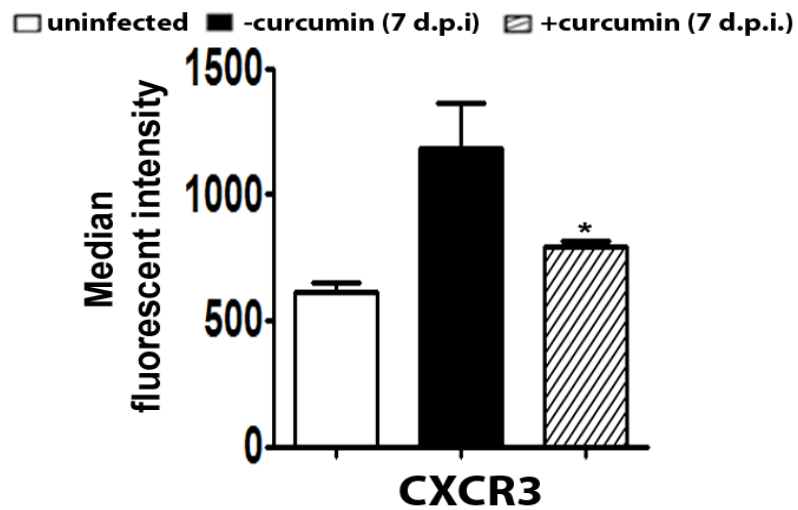

**Supplementary Figure 2.** FACS analysis of CXCR3<sup>+</sup>/CD3<sup>+</sup>/CD8<sup>+</sup> cells in brain leucocytes of uninfected and *P. berghei*-infected mice.

**Supplementary Table 1.** Primers used in qPCR reactions

| Gene                            | Gene sequence                                                                           |
|---------------------------------|-----------------------------------------------------------------------------------------|
| <i>CXCR3</i>                    | Forward 5' AATGCCACCCATTGCCAGTAC 3'<br>Reverse 5' AGCAGTAGGCCATGACCAGAAG 3'             |
| <i>CXCL9</i>                    | Forward 5' GCCATGAAGTCCGCTGTTCT 3'<br>Reverse 5' GGGTTCCTCGAACTCCACACT                  |
| <i>CXCL10</i>                   | Forward 5' GACGGTCCGCTGCAACTG 3'<br>Reverse 5' GCTTCCTATGGCCCTCATT 3'                   |
| <i>TNF<math>\alpha</math></i>   | Forward 5' AAGCCTGTAGCCACGTCGTA3'<br>Reverse 5' GGCACCACTAGTTGGTTGTCTTTG 3'             |
| <i>IFN<math>\gamma</math></i>   | Forward 5' TCAAGTGGCATAGATGTGGAAGAA<br>Reverse 5' TGGCTCTGCAGGATTTTCATG 3'              |
| <i>ICAM1</i>                    | Forward 5' GCCTCCGACTTTTCGATCTT 3'<br>Reverse 5' GTCAGGGGTGTCGAGCTTTG 3'                |
| <i>CD8<math>\beta</math></i>    | Forward 5' GCTGGTAGTCTGCATCCTGCTTC 3'<br>Reverse 5' TTGCTAGCAGGCTATCAGTCTTGTG 3'        |
| <i>18S rRNA P. berghei ANKA</i> | Forward 5' AAGCATTAAATAAAGCGAATACATCCTTAC 3'<br>Reverse 5' GGAGATTGGTTTTGACGTTTATGTG 3' |
| <i>CCR7</i>                     | Forward 5' TCATTGCCGTGGTGGTAGTCTTCA 3'<br>Reverse 5' ATGTTGAGCTGCTTGCTGGTTTCG 3'        |
| <i>CCL19</i>                    | Forward 5' ATGTGAATCACTCTGGCCCAGGAA 3'<br>Reverse 5' AAGCGGCTTTATTGGAAGCTCTGC 3'        |
| <i>CCL20</i>                    | Forward 5' CGACTGTTGCCTCTCGTACA 3'<br>Reverse 5' GAGGAGGTTACAGCCCTTT 3'                 |
| <i>CCL21</i>                    | Forward 5' TGAGCTATGTGCAAACCCTGAGGA3'<br>Reverse 5' TGAGGGCTGTGTCTGTTTCAGTTCT3'         |
| <i>Granzyme B</i>               | Forward 5' CCTCCTGCTACTGCTGAC 3'<br>Reverse 5' GTCAGCACAAAGTCCTCTC 3'                   |

**Supplementary Table 2.** Analysis of curcumin in plasma and brain of mice.

| Sample               | Curcumin (ng/g) | DMC (ng/g) | BDMC (ng/g) | Curcumin glucuronide (ng/g) |
|----------------------|-----------------|------------|-------------|-----------------------------|
| Uninfected 2h plasma | 2.84            | ND         | ND          | 541.32                      |
| Uninfected 4h plasma | 11.86           | 4.86       | ND          | 420.16                      |
| Infected 2h plasma   | 10.96           | 1.78       | 0.3         | 525.7                       |
| Infected 4h plasma   | 2.88            | 0.28       | 0.28        | 51.94                       |
| Uninfected 2h brain  | 1.97            | 0.25       | 0.082       | ND                          |
| Uninfected 4h brain  | 1.60            | 0.084      | ND          | ND                          |
| Infected 2h brain    | 4.77            | 0.59       | 0.17        | ND                          |
| Infected 4h brain    | ND              | ND         | ND          | ND                          |

ND, Not detected; DMC, demethoxy curcumin; BDMC, bisdemethoxy curcumin

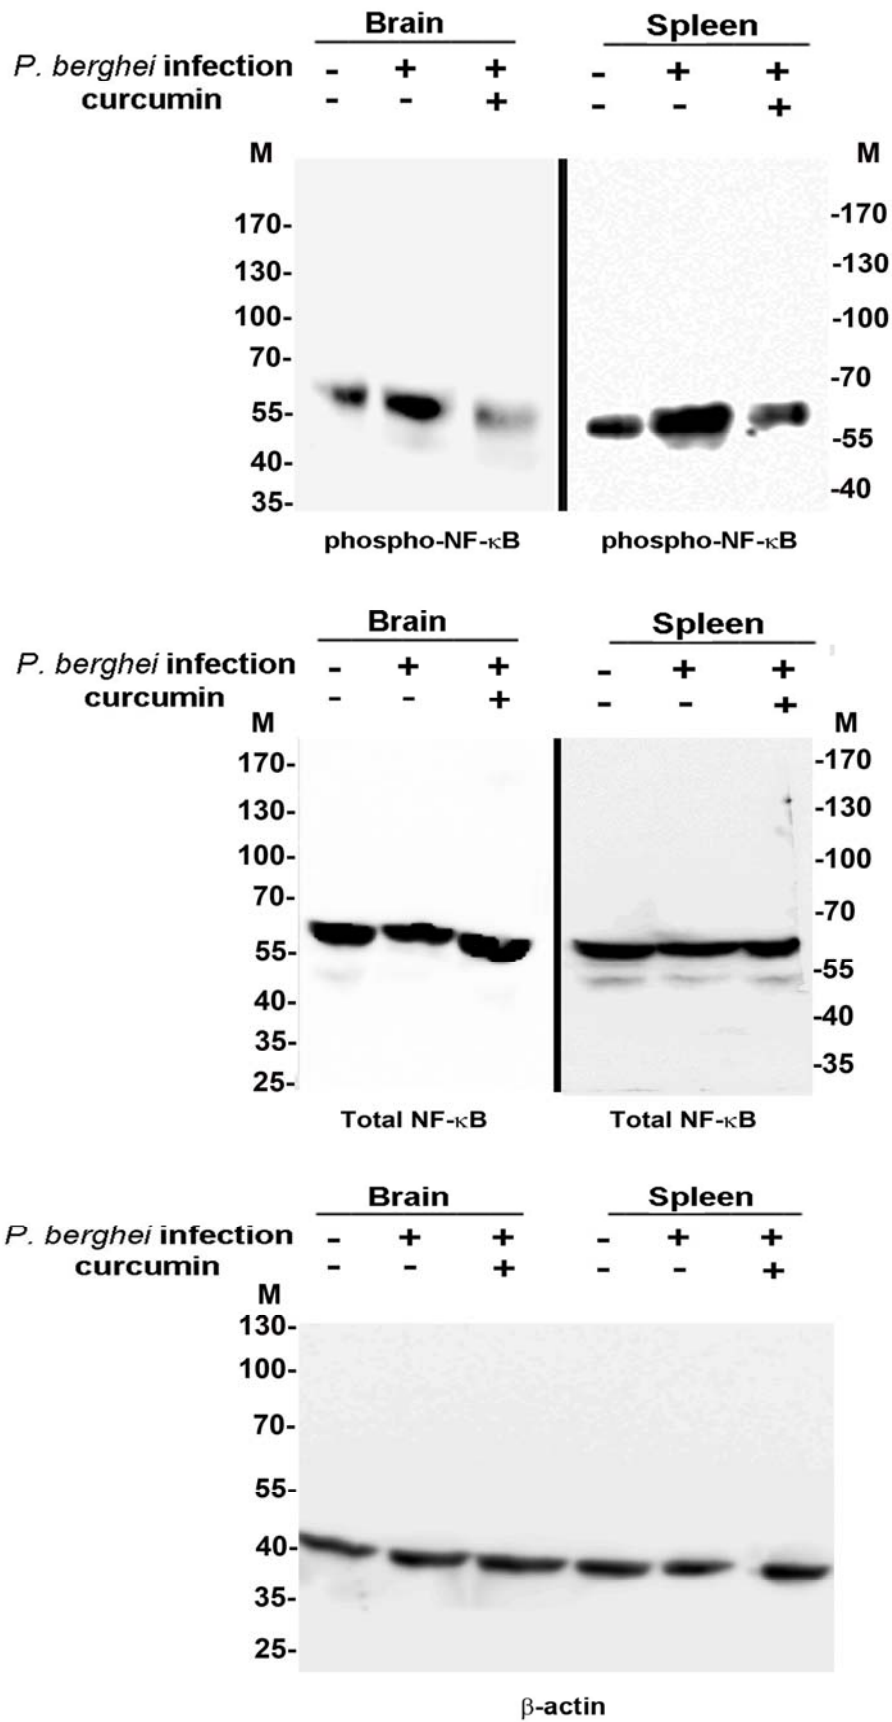

Supplementary Figure 3. Unprocessed original scans of blots in Figure 5b.
